# Supplementary material
Source: Springer Nature journal article supplement (https://www.springermedizin.de/resource/supplementary/12891_2014_2311_MOESM2_ESM.pdf/9509940)
Supplement: MOESM2 [file 9509940]

### Scoring algorithms of OPAQ scales and dimensions

| <b>OPAQ Scale</b>          | <b>Number of Questions</b> | <b>Question</b> | <b>Recoding</b> |
|----------------------------|----------------------------|-----------------|-----------------|
| Walking/Bending            | 7                          | 7 - 13          | 7, 9, 10        |
| Standing/Sitting           | 3                          | 14 - 16         | None            |
| Dressing/Reaching          | 3                          | 17 - 19         | 17, 18, 19      |
| Household/Self-Care        | 4                          | 20 - 23         | 22, 23          |
| Transfers                  | 4                          | 24 - 27         | None            |
| Fear of Falls              | 5                          | 28 - 32         | None            |
| Social Activity            | 2                          | 33 - 34         | 33, 34          |
| Support, Family and Friend | 2                          | 36 - 37         | 36, 37          |
| Back Pain                  | 4                          | 38 - 41         | None            |
| Fatigue                    | 2                          | 42 - 43         | 42              |
| Usual Work                 | 1                          | 44              | 44              |
| Level of Tension           | 5                          | 45 - 49         | 48, 49          |
| Body Image                 | 3                          | 50 - 52         | None            |
| Independence               | 3                          | 53 - 55         | 53              |

Abbreviation: OPAQ= Osteoporosis Patient Assessment Questionnaire.
